# Supplementary material for: Ketamine-induced apoptosis in the mouse cerebral cortex follows similar characteristic of physiological apoptosis and can be regulated by neuronal activity
Source: PubMed Central journal article supplement (PMC5474024; doi:10.1186/s13041-017-0302-2), 2017-06-17
Supplement: 13041_2017_302_MOESM1_ESM.pdf [file 13041_2017_302_MOESM1_ESM.pdf]

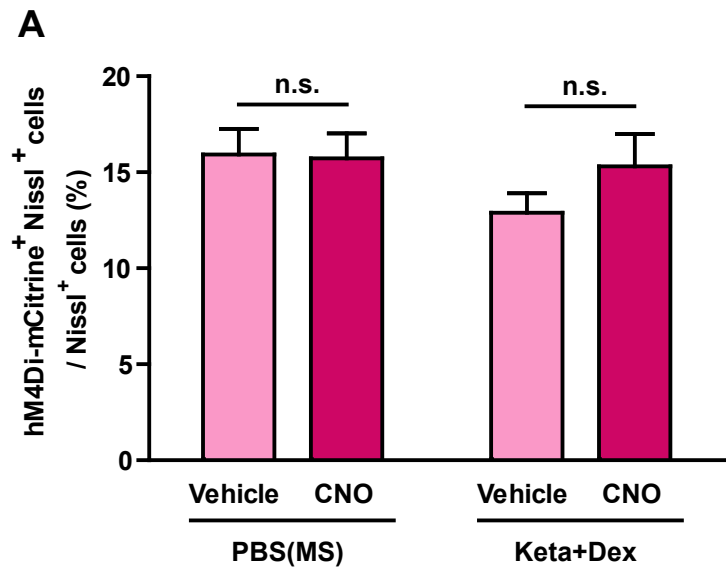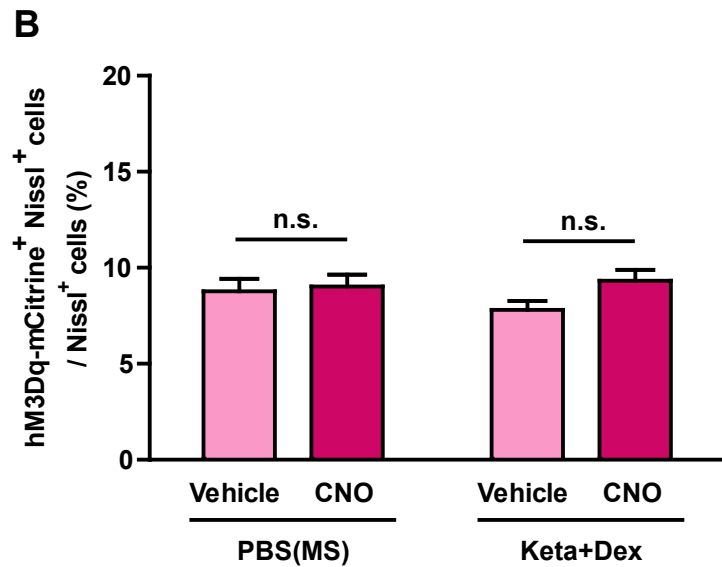

Supplementary Figure 1, Wang et al.
